# S4 Figure

CEOP3108

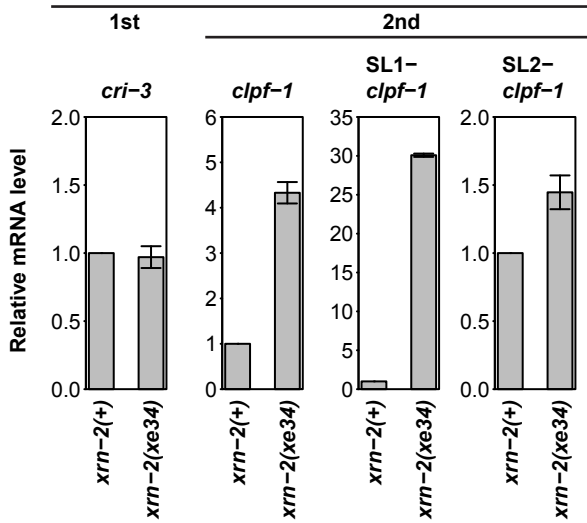

Source: https://storage.googleapis.com/plos-corpus-prod/10.1371/journal.pgen.1006313/1/pgen.1006313.s004.pdf?X-Goog-Algorithm=GOOG4-RSA-SHA256&X-Goog-Credential=wombat-sa%40plos-prod.iam.gserviceaccount.com%2F20250315%2Fauto%2Fstorage%2Fgoog4_request&X-Goog-Date=20250315T185302Z&X-Goog-Expires=86400&X-Goog-SignedHeaders=host&X-Goog-Signature=97974665e57c2e7ff8866b06542574307366dd9b1d16369767333b86bbbc527d75c89cbf7e38481b58a5b5c547136077f4f2a57b1961454a8207243bd19d8cc77fe59a96aeff1373121138c5baaa6dc69885fc5056fc096bc551bcbde3a99cb904f85f2b0ae99bbb82c4cf0e3d4cb8dd3900bb89c3e017b134e944f6bd2db349303e75dd14e0c05094661375f741cf937bdf06385ce332624d721dae796bacb64c2dbf4a8e240b035b607e7cd4dc2ed5dd4443453c19b1b89b1fb5b3241c94e627dd2768d673ca267e82a5e0245392db549fd2ac16f277eda2673bed1512ded408f525ae3db464181c0a269599b4544c05102462680b7ea15259ef6aa6810b3c
